# Supplementary material
Source: HighWire-hosted journal article supplement (https://journals.biologists.com/crawlprevention/governor?content=%2FCustomError%3Fstatuscode%3D404%26404%3Bhttp%3A%2F%2Fjournals.biologists.com%3A80%2Fdmm%2Fhighwire%2Ffilestream%2F1338262%2Ffield_highwire_adjunct_files%2F0%2FDMM037259supp.pdf)
Supplement: governor [file governor]

Validate User


We are sorry, but we are experiencing unusual traffic at this time. Please help us confirm that you are not a robot and we will take you to your content.

Could not validate captcha. Please try again.

Take me to my Content
